# Supplementary material for: Physical activity in paid work time for desk-based employees: a qualitative study of employers’ and employees’ perspectives
Source: PubMed Central journal article supplement (PMC7137494; doi:10.1186/s12889-020-08580-1), 2020-04-06
Supplement: 12889_2020_8580_MOESM1_ESM.pdf [file 12889_2020_8580_MOESM1_ESM.pdf]

# **Incentivised Physical Activity in Workplaces (IPAWs) Survey**

## Tell us about you

In this section we want to find out a bit about who you are.

1. In what year were you born?

2. What is your home postcode?

3. What is your gender?

Please choose one of the following:

Male

Female

Other. Please specify: \_\_\_\_\_

4. How would you describe your cultural or ethnic background?

Please choose one of the following:

White Scottish

Other white British. Please specify: \_\_\_\_\_

Other. Please specify: \_\_\_\_\_

5. What is the highest qualification that you have ever COMPLETED?

Please choose one of the following:

No formal qualification after school

Trade, technical certificate, apprenticeship or diploma

University degree or higher

## Tell us about your job

In this section we want to find out a bit about your work and job.

**6. Which of the following best describes your current employment situation?**

Please choose one of the following:

- Employed full time
- Employed part time
- Zero hours contract
- Other. Please specify: \_\_\_\_\_

**7. How many hours did you work in the last 7 days?**

\_\_\_\_\_ HRS

**8. During the last 7 days, how many days were you at work?**

\_\_\_\_\_ DAYS

**9. How would you describe your typical work day in the last 7 days?**

This involves only your work day, and **DOES NOT INCLUDE** travel to and from work, or what you did in your leisure time.

Please indicate the percentage of time in each of the following:

|           |                                                                |       |          |
|-----------|----------------------------------------------------------------|-------|----------|
| <b>A.</b> | <b>Sitting (including driving – but not too and from work)</b> | _____ | <b>%</b> |
| <b>B.</b> | <b>Standing</b>                                                | _____ | <b>%</b> |
| <b>C.</b> | <b>Walking</b>                                                 | _____ | <b>%</b> |
| <b>D.</b> | <b>Heavy labor or physically demanding tasks</b>               | _____ | <b>%</b> |

*These should total 100%*

**10. In the past 7 days, how much time have you spent doing physical activity which was enough to raise your breathing rate?**

This may include sport, exercise and brisk walking or cycling for recreation or to get to and from places, but **DOES NOT INCLUDE** housework or activity as part of your job.

\_\_\_\_\_ HRS

**11. What is your office layout?**

Please choose one of the following:

Open plan

Own office

Other. Please specify: \_\_\_\_\_

**12. Would you describe yourself as having flexible working hours?**

Please choose one of the following:

Yes

No

**13. Do you have any line management responsibilities?**

Please choose one of the following:

Yes

No

**This is the end of the survey, thank you for participating!**
